# Supplementary material for: Extracellular Superoxide Dismutase Expression in Papillary Thyroid Cancer Mesenchymal Stem/Stromal Cells Modulates Cancer Cell Growth and Migration
Source: PubMed Central journal article supplement (PMC5316948; doi:10.1038/srep41416), 2017-02-20
Supplement: srep41416-s1.pdf [file srep41416-s1.pdf]

# Extracellular Superoxide Dismutase Expression in Papillary Thyroid Cancer Mesenchymal Stem/Stromal Cells Modulates Cancer Cell Growth and Migration

Alessia Parascandolo<sup>1</sup>, Francesca Rappa<sup>2,3</sup>, Francesco Cappello<sup>2,3</sup>, Jaehyup Kim<sup>4</sup>, David A. Cantu<sup>4</sup>, Herbert Chen<sup>5</sup>, Gianluigi Mazzoccoli<sup>6</sup>, Peiman Hematti<sup>4,7</sup>, Maria Domenica Castellone<sup>8,9</sup>, Marco Salvatore<sup>1</sup> & Mikko O. Laukkanen<sup>1</sup>

Table T1

|                | <b>Forward primer</b> | <b>Reverse primer</b>  |
|----------------|-----------------------|------------------------|
| FAP            | tacgtttcatcactggcct   | catctgctggtccgtggatg   |
| CollA1         | gctactaccgggctgatgat  | accagtctccatgttgcaga   |
| Tenascin       | acaacatcaagctgccagtg  | ggggatggtgatgcatggtg   |
| SOD1           | aggcatcatcaatttcgag   | acattgcccaagtctccaac   |
| SOD2           | tgtaccgggtccgagtttc   | ttcaggccctacaattcacc   |
| SOD3           | cttcgcctctgctgaagtct  | gggtgtttcgggtacaaatgg  |
| NOX1           | ttaacagcacgctgatcctg  | ctggagagaatggaggcaag   |
| NOX2           | tcacttctccacaaaacc    | gggattgggcattcctttat   |
| NOX3           | gcccaactggaacaatgagt  | ttcctgggtggagttctttgg  |
| NOX4           | cttccggtggtttgagatt   | tgggtccacaacagaaaaca   |
| NOX5           | ctacgtggtagtgggctgt   | atgcaggaactggagcagat   |
| FGF9           | gtggactctacctcgggatg  | gtgtgaatttctggtgccgt   |
| BMP2           | aatgcaagcaggtgggaaag  | gctgtgttcacattggtgca   |
| IL1 $\alpha$   | tgatcagtacctcacggctg  | tggctcttcacattggtgca   |
| MCP1           | caatcaatgccccagtcacc  | gggtgggtccatggaatcctga |
| IL8            | cagttttgccaaggagtgct  | acttctccacaaccctctgc   |
| $\beta$ -actin | gacattaaggagaag       | gctcgtagctcttctcca     |
